# Supplementary material for: Long noncoding RNA lnc-LOC645166 promotes adriamycin resistance via NF-κB/GATA3 axis in breast cancer
Source: PubMed Central journal article supplement (PMC7288957; doi:10.18632/aging.103012), 2020-05-27
Supplement: aging-12-103012-s001..pdf [file aging-12-103012-s001..pdf]

## SUPPLEMENTARY TABLES

**Supplementary Table 1. Sequences of siRNA Against Specific Target.**

|          |       |                         |
|----------|-------|-------------------------|
| Si-GATA3 | 5'-3' | AGCCTAAACGCGATGGATATATG |
| Si-NF-KB | 5'-3' | AACGTAAAAGGACATATGAGACC |
| sh-NC    | 5'-3' | TTCTCCGAACGTGTCACGT     |

**Supplementary Table 2. Sequences of shRNA Against Specific Target.**

|                |       |                       |
|----------------|-------|-----------------------|
| sh-LOC645166-1 | 5'-3' | GGATCACGAGGTAGGAGTTAA |
| sh-LOC645166-2 | 5'-3' | CCAACAGGAGTCTAATCAA   |
| sh-NC          | 5'-3' | TTCTCCGAACGTGTCACGT   |

**Supplementary Table 3. Sequences for PCR primers used in this study.**

|                 |                |                         |
|-----------------|----------------|-------------------------|
| ENST00000457075 | Forward(5'-3') | GCAGAATGGGGAAATGGAG     |
|                 | Reverse(5'-3') | AGACAATGGAACAAGCAAACAA  |
| ENST00000452795 | Forward(5'-3') | CCTCCGTTCCGTCTATTCTCA   |
|                 | Reverse(5'-3') | TGGGGCTCTTTCAGGTTCTC    |
| lnc-DIS3-4:1    | Forward(5'-3') | TGGGAAGGAAAGCACAATAAC   |
|                 | Reverse(5'-3') | ACTGGGTAGCAAGGGAACG     |
| ENST00000539086 | Forward(5'-3') | CGCCTCTTCTGCATCTTTTA    |
|                 | Reverse(5'-3') | CGCCGACAGCACTCTTACTA    |
| NR_130928       | Forward(5'-3') | GATAAAACGGAAACCCAGAG    |
|                 | Reverse(5'-3') | CAGTGAGGGCAAAAGAGGG     |
| lnc-GPR135-3:1  | Forward(5'-3') | GCATTATGGTGACTGCCTGTAG  |
|                 | Reverse(5'-3') | AATATCCTGGCTGCTTGGTTC   |
| Lnc-GGT1-5:2    | Forward(5'-3') | TAGGCAAGGACTGGCATCG     |
|                 | Reverse(5'-3') | AATATCCTGGCTGCTTGGTTC   |
| NR_027356       | Forward(5'-3') | CGGTCCCTGGAGGAAACA      |
|                 | Reverse(5'-3') | CCAACAGTCCCAATAATGCC    |
| NR_037631       | Forward(5'-3') | CGGGAAAGGGAAGCAAAG      |
|                 | Reverse(5'-3') | GAAGACAATGAAAACCCACCAC  |
| ENST00000369605 | Forward(5'-3') | CACTGGGAGCCAATGAAACA    |
|                 | Reverse(5'-3') | CACGAAGTGGAGTTATGGGAAG  |
| BCAS3           | Forward(5'-3') | ACTGGGAATGAACCGCCTTTG   |
|                 | Reverse(5'-3') | CTTCGCCACTGATAGGGATGC   |
| TACSTD2         | Forward(5'-3') | ACAACGATGGCCTCTACGAC    |
|                 | Reverse(5'-3') | GTCCAGGTCTGAGTGGTTGAA   |
| KRT19           | Forward(5'-3') | AACGGCGAGCTAGAGGTGA     |
|                 | Reverse(5'-3') | GGATGGTCGTGTAGTAGTGCC   |
| ST14            | Forward(5'-3') | TTCCTGCCAGTCAACAACGTC   |
|                 | Reverse(5'-3') | GGTACTGCAAATGCCACACC    |
| CBR3            | Forward(5'-3') | TGGACATCGACGACTTGCAG    |
|                 | Reverse(5'-3') | TGTTGACCAGTACGTTGAGCC   |
| STARD10         | Forward(5'-3') | TTCCGGTCAGAGTGTGAGG     |
|                 | Reverse(5'-3') | CGGTACTCAATGTCGTGTAGGAC |
| FAM102B         | Forward(5'-3') | CTTCGTCAATGGGGTCTCTCT   |
|                 | Reverse(5'-3') | CACAGTTTGCTTGTACCACCT   |
| CRLF1           | Forward(5'-3') | CTCTCCCGTGACTCAACGC     |
|                 | Reverse(5'-3') | GGGCAGGCCAATAGAGG       |
| ATPAF1          | Forward(5'-3') | CAGTGCATCGCCAACCAAG     |
|                 | Reverse(5'-3') | TTAAAGGTCTCCACTAACCCGT  |
| RTN4RL1         | Forward(5'-3') | GCTGTTGGTAGCTGCGGAG     |

|         |                |                         |
|---------|----------------|-------------------------|
| GATA3   | Reverse(5'-3') | TCGAGTAGATCCACAGGGTGA   |
|         | Forward(5'-3') | GCCCCTCATTAAGCCCAAG     |
| SLC39A6 | Reverse(5'-3') | TTGTGGTGGTCTGACAGTTTCG  |
|         | Forward(5'-3') | ATGCAAGTCACCACCATAGTCA  |
| IGSF3   | Reverse(5'-3') | ACGTGGAATCAAATAGGCACT   |
|         | Forward(5'-3') | AGGGCTCCCACATCACTATCT   |
| LLGL2   | Reverse(5'-3') | GAAGGCAGGTAAATGGACCAC   |
|         | Forward(5'-3') | CGGGACCTGTTCCAGTTTAAAC  |
| GAPDH   | Reverse(5'-3') | CGTCACAGCGTTGTTCTCC     |
|         | Forward(5'-3') | GGAGCGAGATCCCTCCAAAAT   |
|         | Reverse(5'-3') | GGCTGTTGTCATACTTCTCATGG |

**Supplementary Table 4. Sequences for PCR primers used in ChIP analysis.**

|       |                |                     |
|-------|----------------|---------------------|
| GATA3 | Forward(5'-3') | CTGGGTCTCAGAGGGTGCT |
|       | Reverse(5'-3') | CGGCTTCTGGTCCTCATTC |

**Supplementary Table 5. Sequences for PCR primers used in RIP analysis.**

|           |                |                       |
|-----------|----------------|-----------------------|
| LOC645166 | Forward(5'-3') | CTGGAAAACAGGAATGTGAGC |
|           | Reverse(5'-3') | CTCTGCGGGTCTGCCATC    |
